# Supplementary material for: Genome-Inspired Chemical Exploration of Marine Fungus Aspergillus fumigatus MF071
Source: PubMed Central journal article supplement (PMC7401266; doi:10.3390/md18070352), 2020-07-06
Supplement: marinedrugs-18-00352-s001.pdf [file marinedrugs-18-00352-s001.pdf]

# Supplementary materials

## Genome-inspired chemical exploring of marine fungus *Aspergillus fumigatus* MF071

Jianying Han <sup>1,3</sup>, Miaomiao Liu <sup>1</sup>, Ian D. Jenkins <sup>1</sup>, Xueting Liu <sup>2</sup>, Lixin Zhang <sup>2,3</sup>, Ronald J. Quinn <sup>1,\*</sup> and Yunjiang Feng <sup>1,\*</sup>

<sup>1</sup> Griffith Institute for Drug Discovery, Griffith University, Brisbane, QLD 4111, Australia;

jianying.han@griffithuni.edu.au (J.H.); miaomiao.liu@griffith.edu.au (M.L.); i.jenkins@griffith.edu.au (I.D.J.)

<sup>2</sup> State Key Laboratory of Bioreactor Engineering, East China University of Science and Technology, Shanghai 200237, China; liuxueting@ecust.edu.cn (X.L.); lxzhang@ecust.edu.cn (L.Z.)

<sup>3</sup> Key Laboratory of Pathogenic Microbiology and Immunology, Institute of Microbiology, Chinese Academy of Sciences, Beijing 100101, China;

\* Correspondence: r.quinn@griffith.edu.au (R.J.Q.), y.feng@griffith.edu.au (Y.F.); Tel.: +61-7-3735-6006 (R.J.Q.), +61-7-3735-8367 (Y.F.)

### Table of Contents

**Figure S1** HRESIMS spectrum of **1**

**Figure S2** <sup>1</sup>H NMR (800 MHz, DMSO-*d*<sub>6</sub>) spectra of **1**

**Figure S3** HSQC (800 MHz, DMSO-*d*<sub>6</sub>) spectrum of **1**

**Figure S4** HMBC (800 MHz, DMSO-*d*<sub>6</sub>) spectrum of **1**

**Figure S5** HRESIMS spectrum of **2**

**Figure S6** <sup>1</sup>H NMR (800 MHz, DMSO-*d*<sub>6</sub>) spectra of **2**

**Figure S7** <sup>1</sup>H-<sup>1</sup>H COSY (800 MHz, DMSO-*d*<sub>6</sub>) spectrum of **2**

**Figure S8** HSQC (800 MHz, DMSO-*d*<sub>6</sub>) spectrum of **2**

**Figure S9** HMBC (800 MHz, DMSO-*d*<sub>6</sub>) spectrum of **2**

**Figure S10** HRESIMS spectrum of **4**

**Figure S11** <sup>1</sup>H NMR (800 MHz, DMSO-*d*<sub>6</sub>) spectra of **4**

**Figure S12** <sup>13</sup>C NMR (200 MHz, DMSO-*d*<sub>6</sub>) spectrum of **4**

**Figure S13** HSQC (800 MHz, DMSO-*d*<sub>6</sub>) spectrum of **4**

**Figure S14** HMBC (800 MHz, DMSO-*d*<sub>6</sub>) spectrum of **4**

**Figure S15** HRESIMS spectrum of **10**

**Figure S16** <sup>1</sup>H NMR (800 MHz, DMSO-*d*<sub>6</sub>) spectra of **10**

**Figure S17** <sup>13</sup>C NMR (200 MHz, DMSO-*d*<sub>6</sub>) spectrum of **10**

**Figure S18** HSQC (800 MHz, DMSO-*d*<sub>6</sub>) spectrum of **10**

**Figure S19** HMBC (800 MHz, DMSO-*d*<sub>6</sub>) spectrum of **10**

**Figure S20** Organization of the fusidane-type antibiotic helvolic acid BGC (*hel*) (**A**) and proposed biosynthetic pathways for helvolic acid and helvolinic acid (**B**).

**Figure S21** Representatives of prenylated indole alkaloids

**Table S1** The calculated <sup>13</sup>C NMR data for two possible isomers (19*S*) and (19*R*) of compound **1** and DP4 analysis

**Table S2** Deduced functions of ORFs in fumitremorgins BGC (*ftm*) from MF071

**Table S3** Deduced functions of ORFs in pseurotins BGC (*psu*) from MF071

**Table S4** Deduced functions of ORFs in fumigaclavines BGC (*fga*) from MF071

**Table S5** Deduced functions of ORFs in helvolic acid BGC (*hel*) from MF071

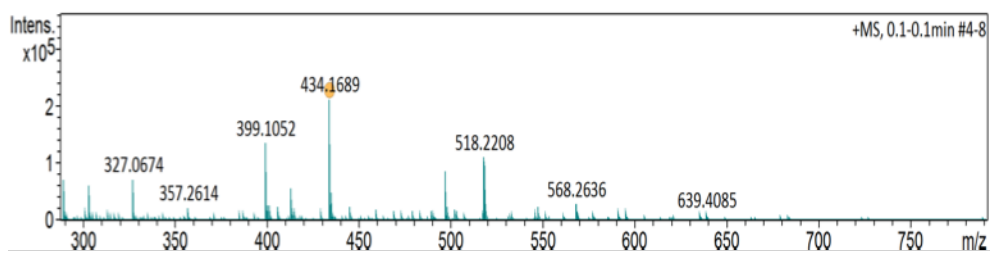

Figure S1 HRESIMS spectrum of **1**

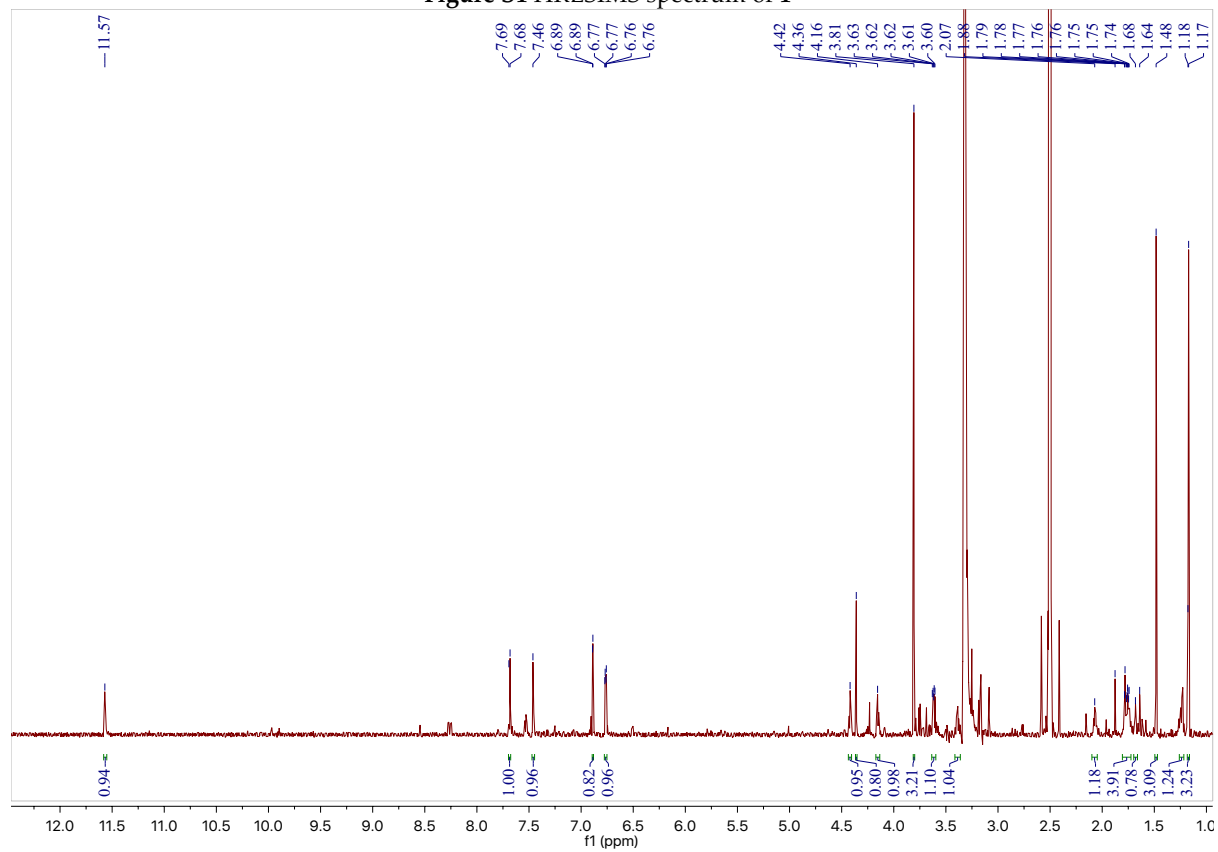

Figure S2 <sup>1</sup>H NMR (800 MHz, DMSO-*d*<sub>6</sub>) spectra of **1**

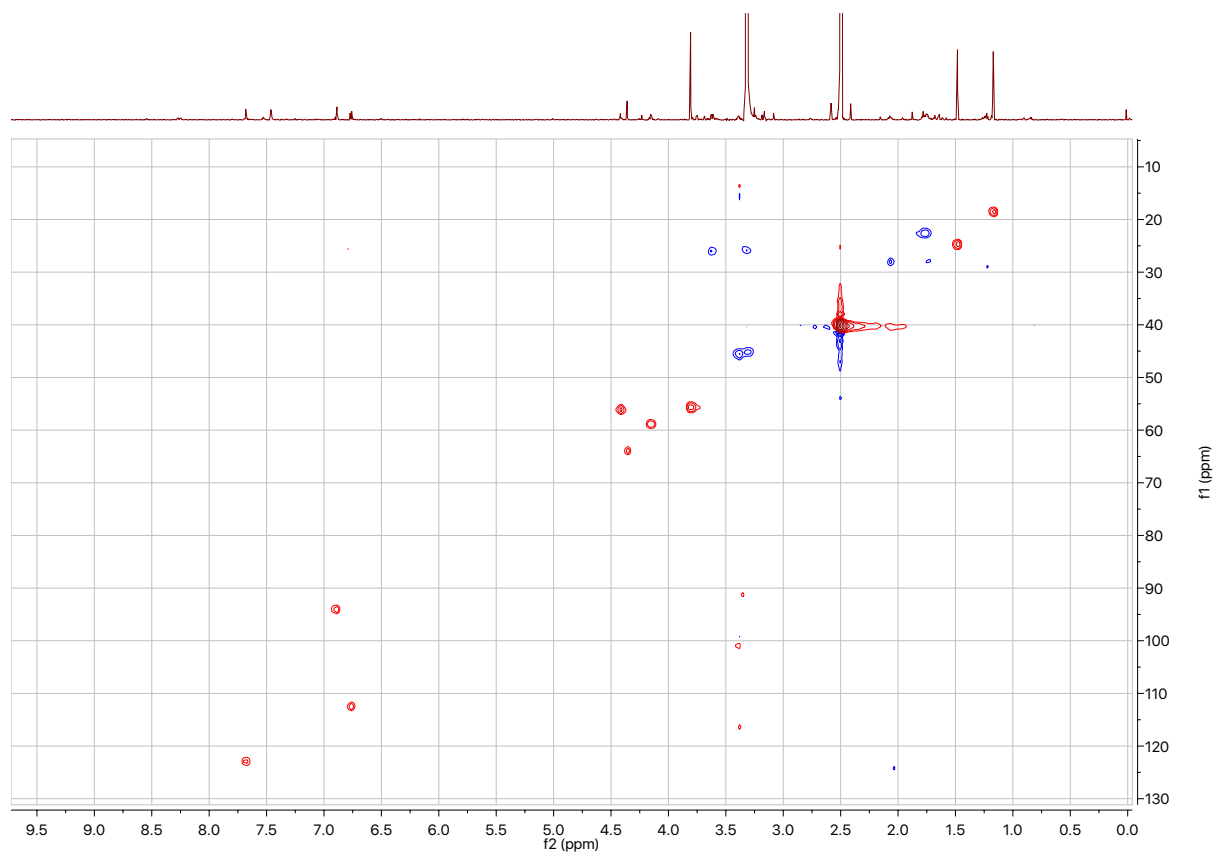

Figure S3 HSQC (800 MHz, DMSO-*d*<sub>6</sub>) spectrum of **1**

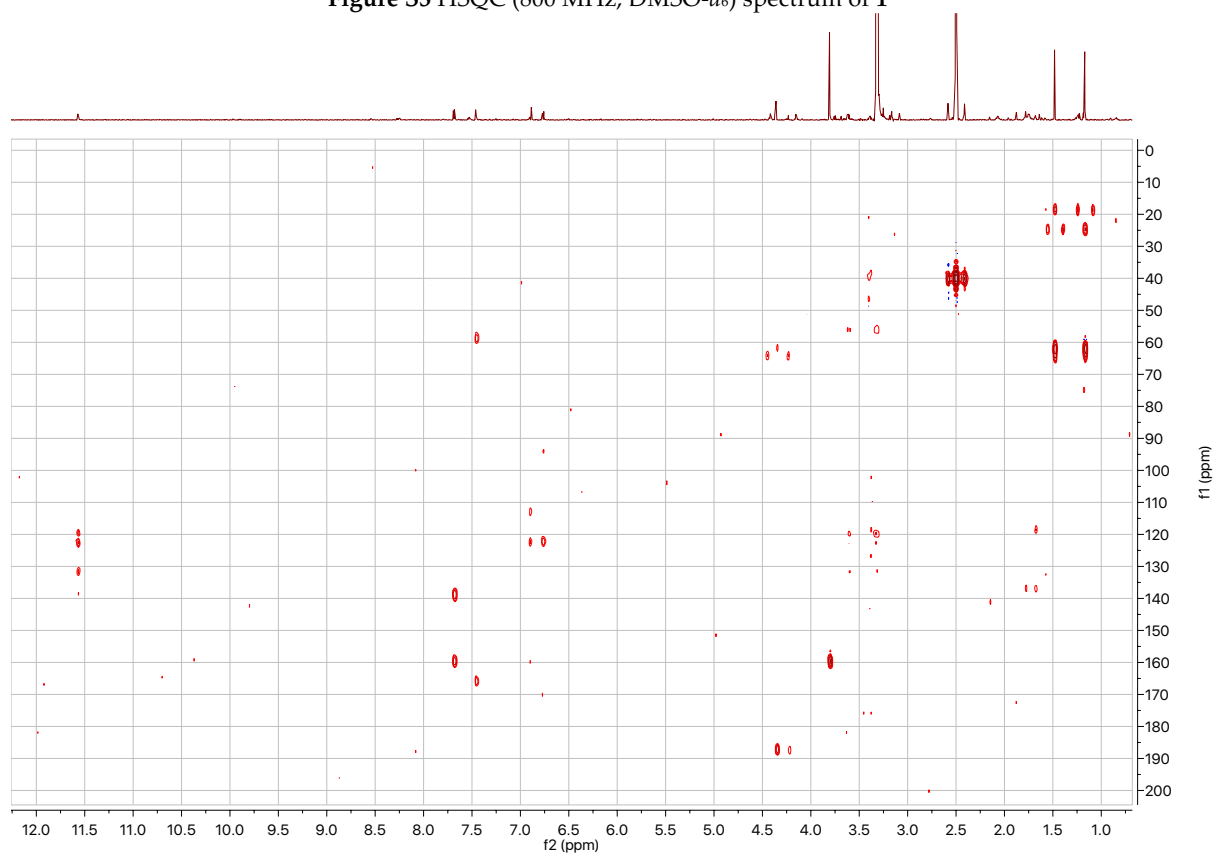

Figure S4 HMBC (800 MHz, DMSO-*d*<sub>6</sub>) spectrum of **1**

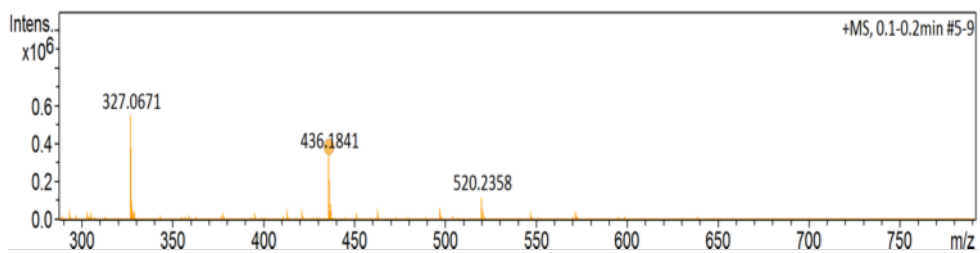

Figure S5 HRESIMS spectrum of 2

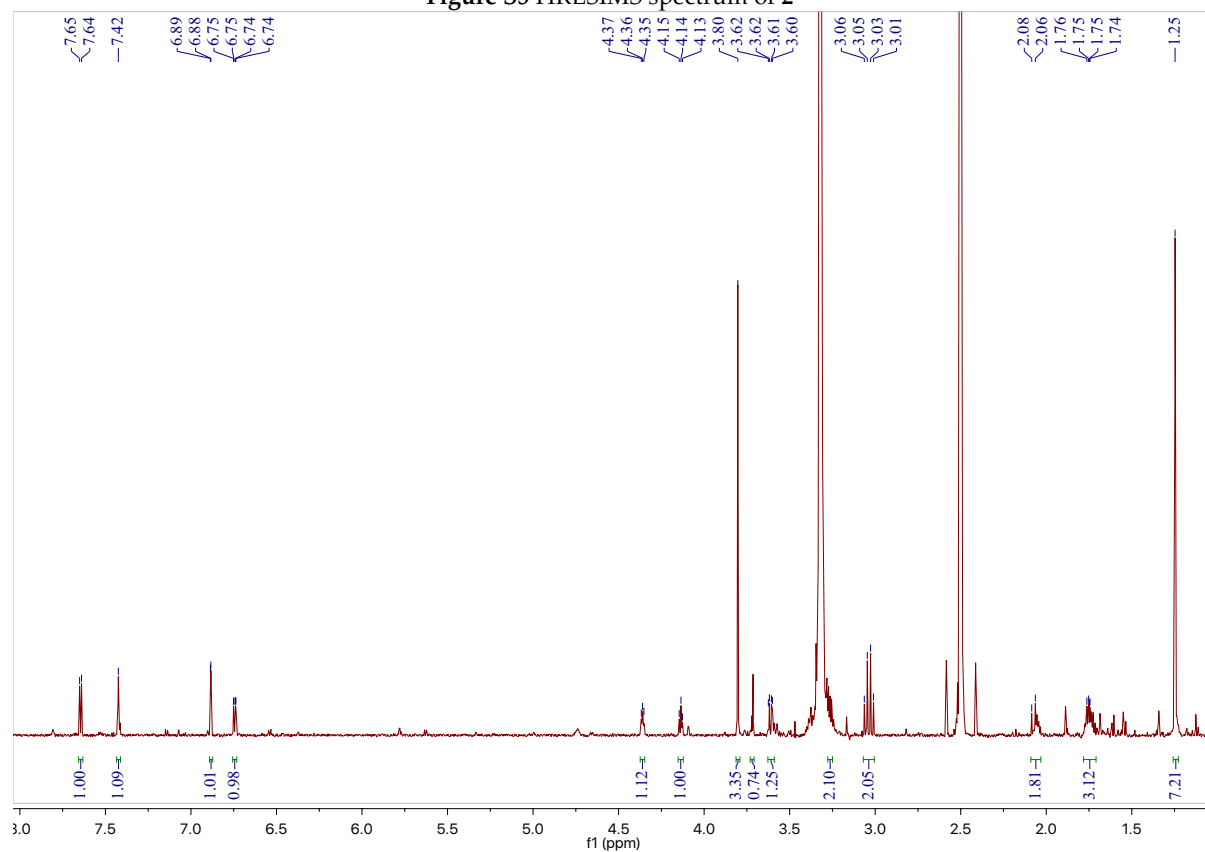

Figure S6  $^1\text{H}$  NMR (800 MHz,  $\text{DMSO-}d_6$ ) spectra of 2

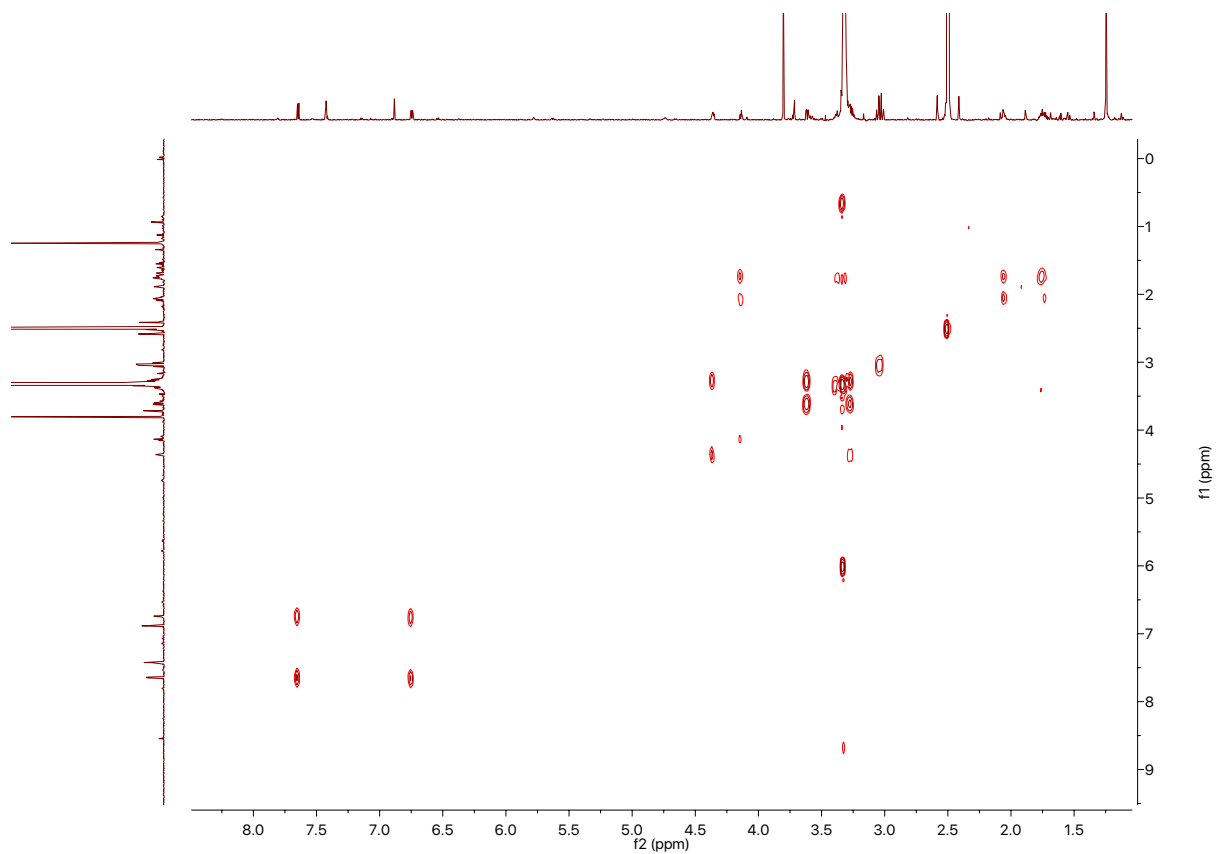

Figure S7  $^1\text{H}$ - $^1\text{H}$  COSY (800 MHz,  $\text{DMSO-}d_6$ ) spectrum of **2**

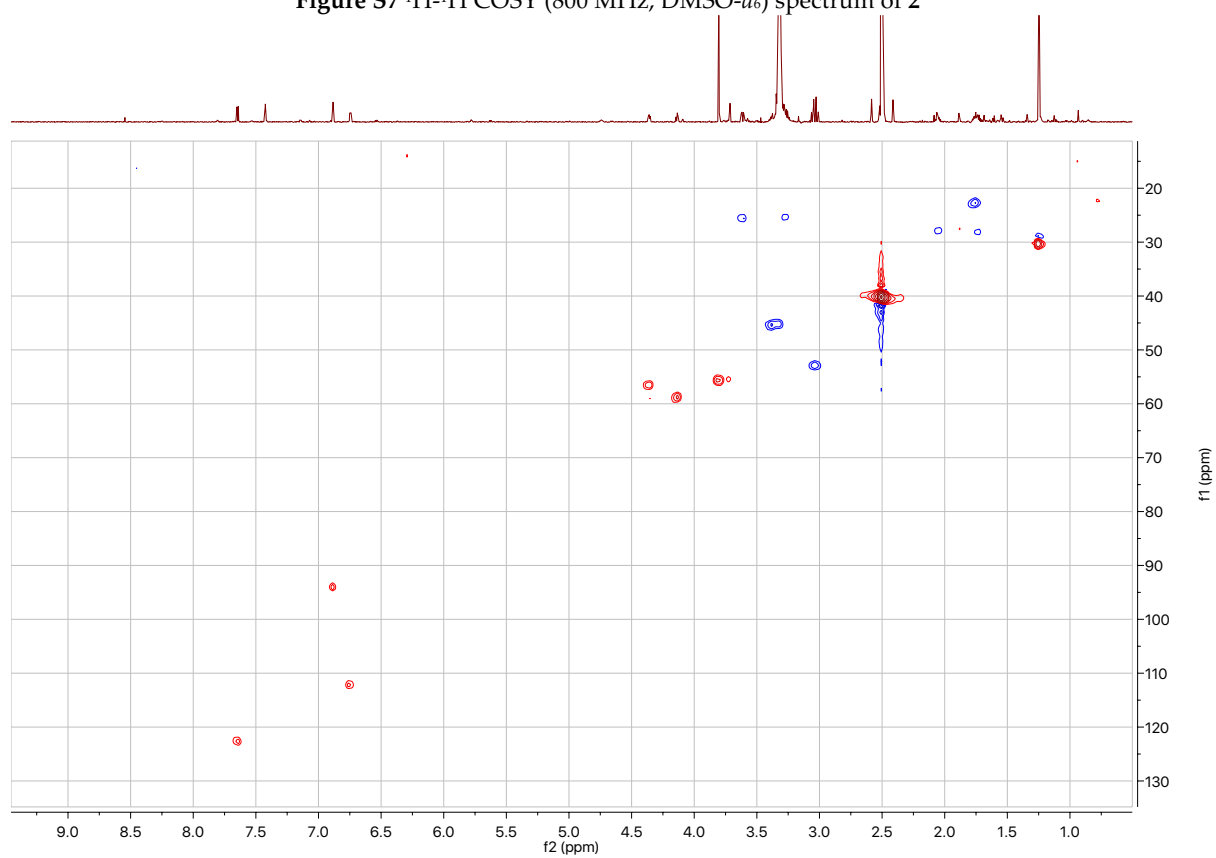

Figure S8 HSQC (800 MHz,  $\text{DMSO-}d_6$ ) spectrum of **2**

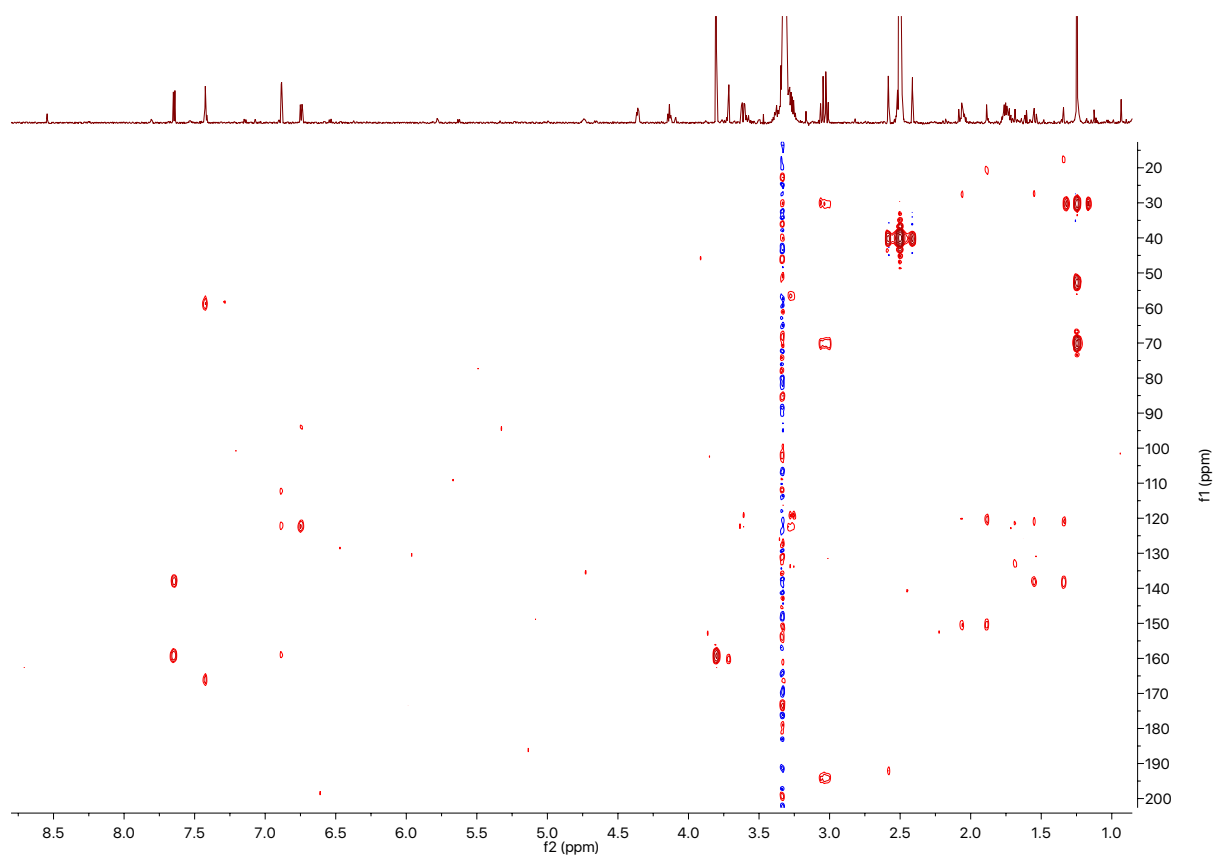

Figure S9 HMBC (800 MHz, DMSO-*d*<sub>6</sub>) spectrum of 2

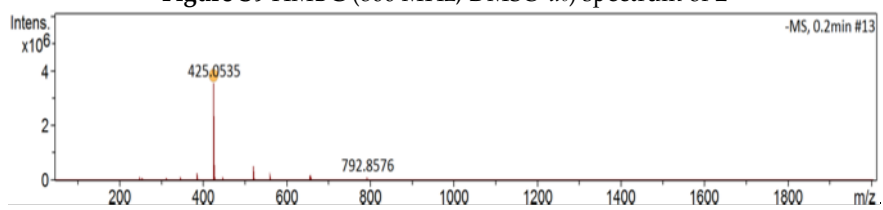

Figure S10 HRESIMS spectrum of 4

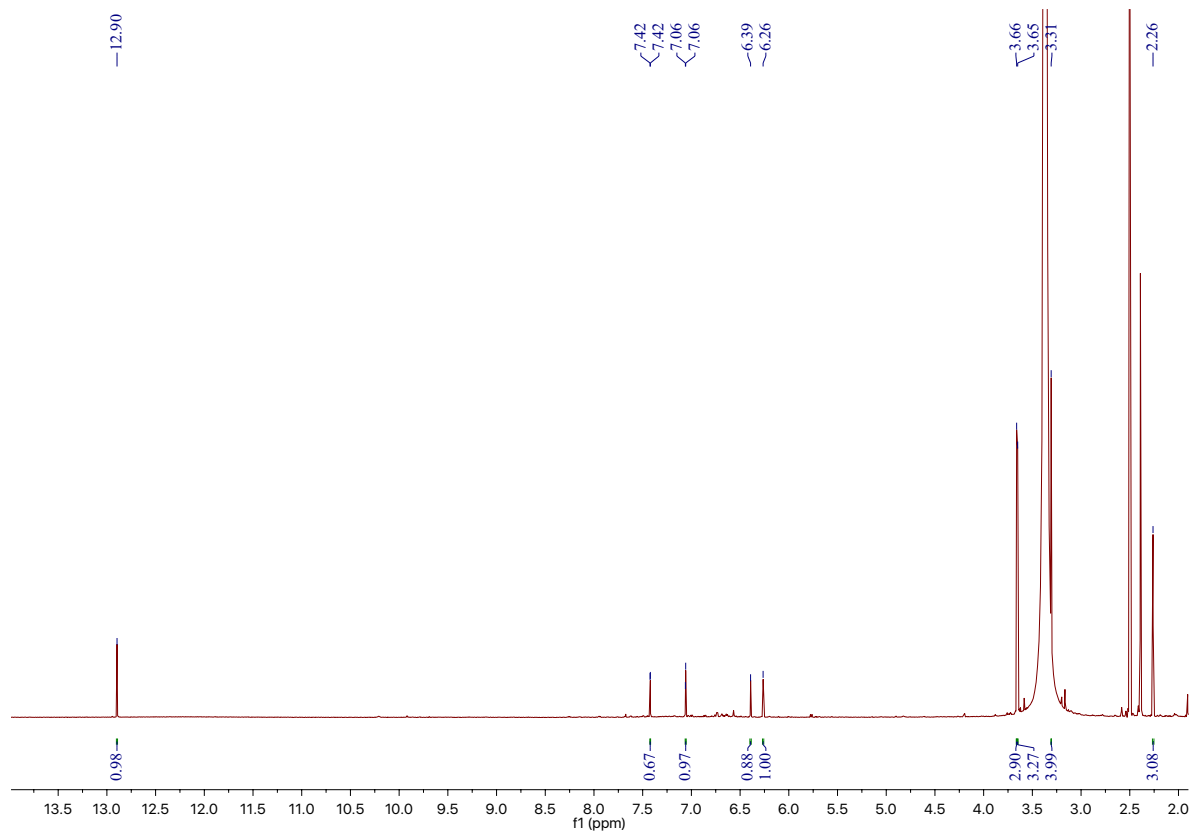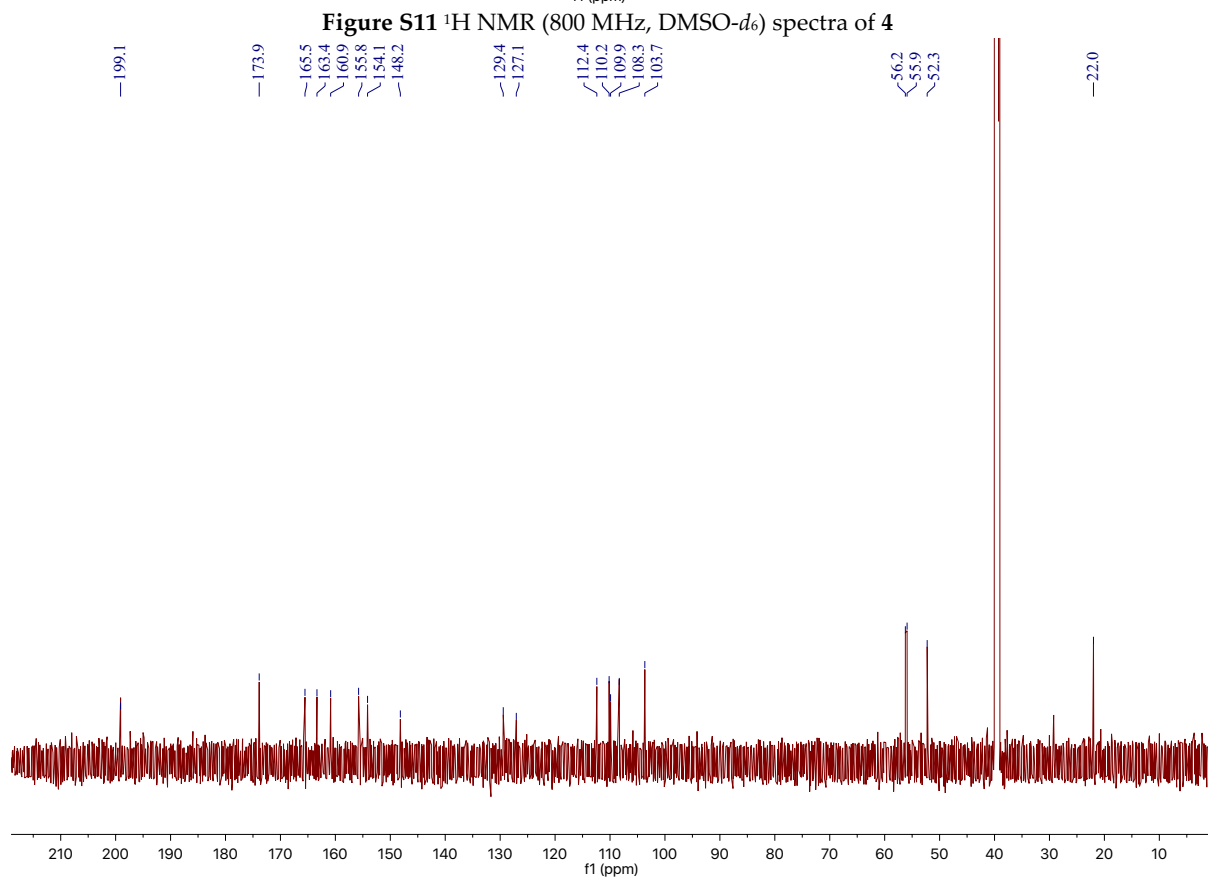

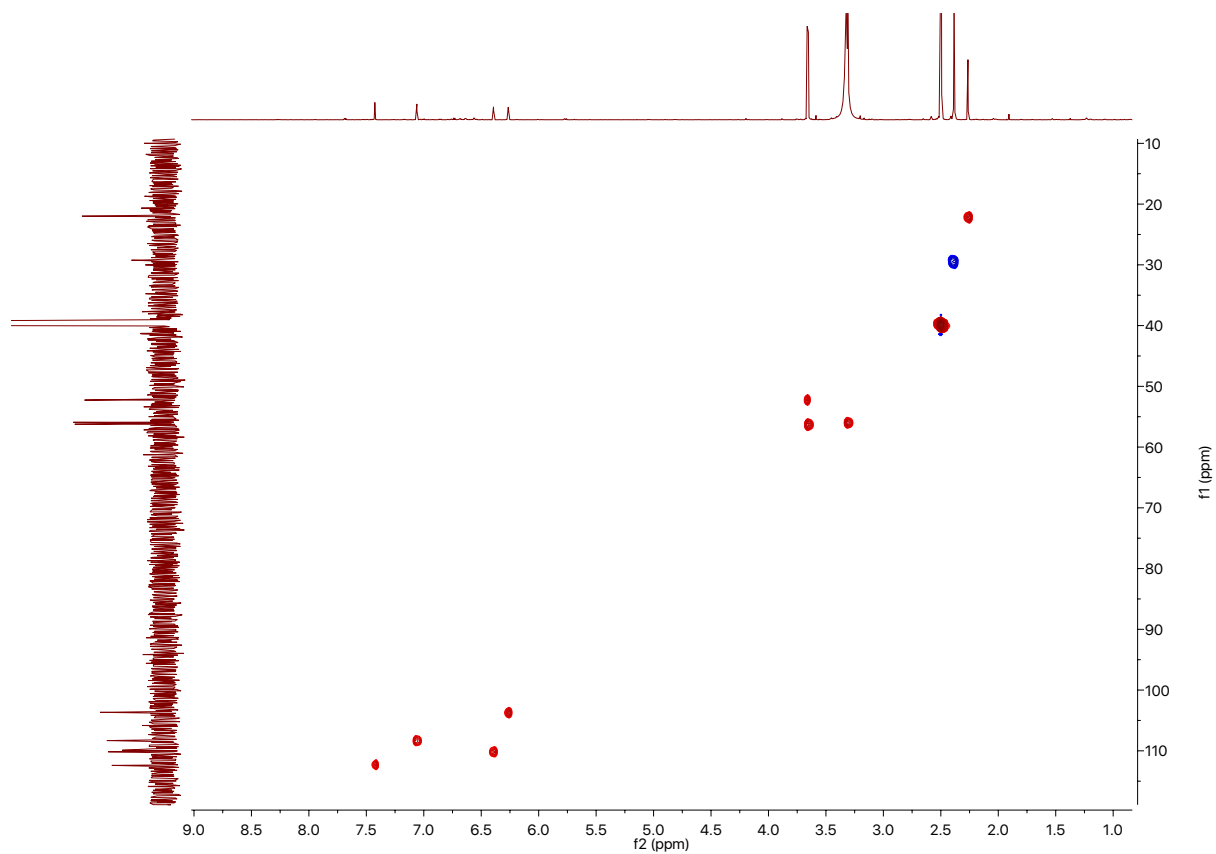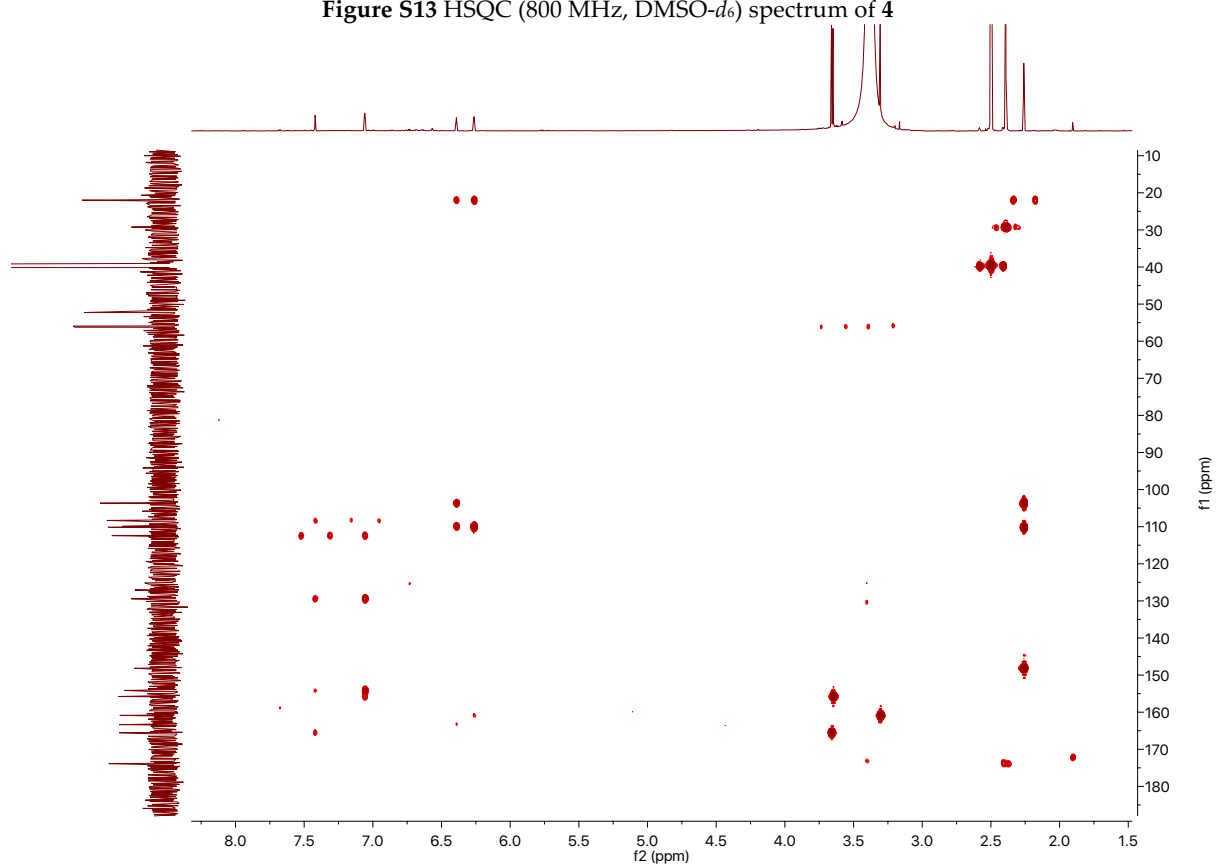



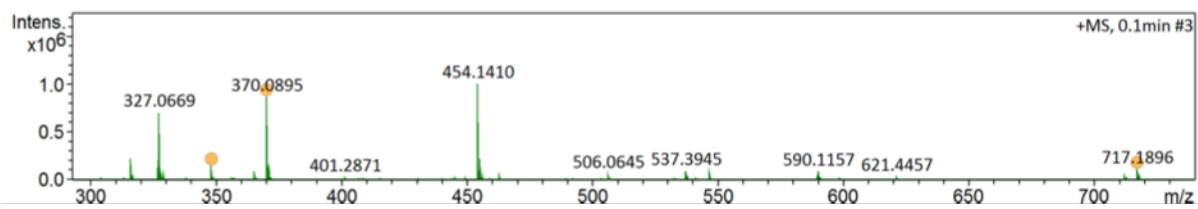

Figure S15 HRESIMS spectrum of compound 10

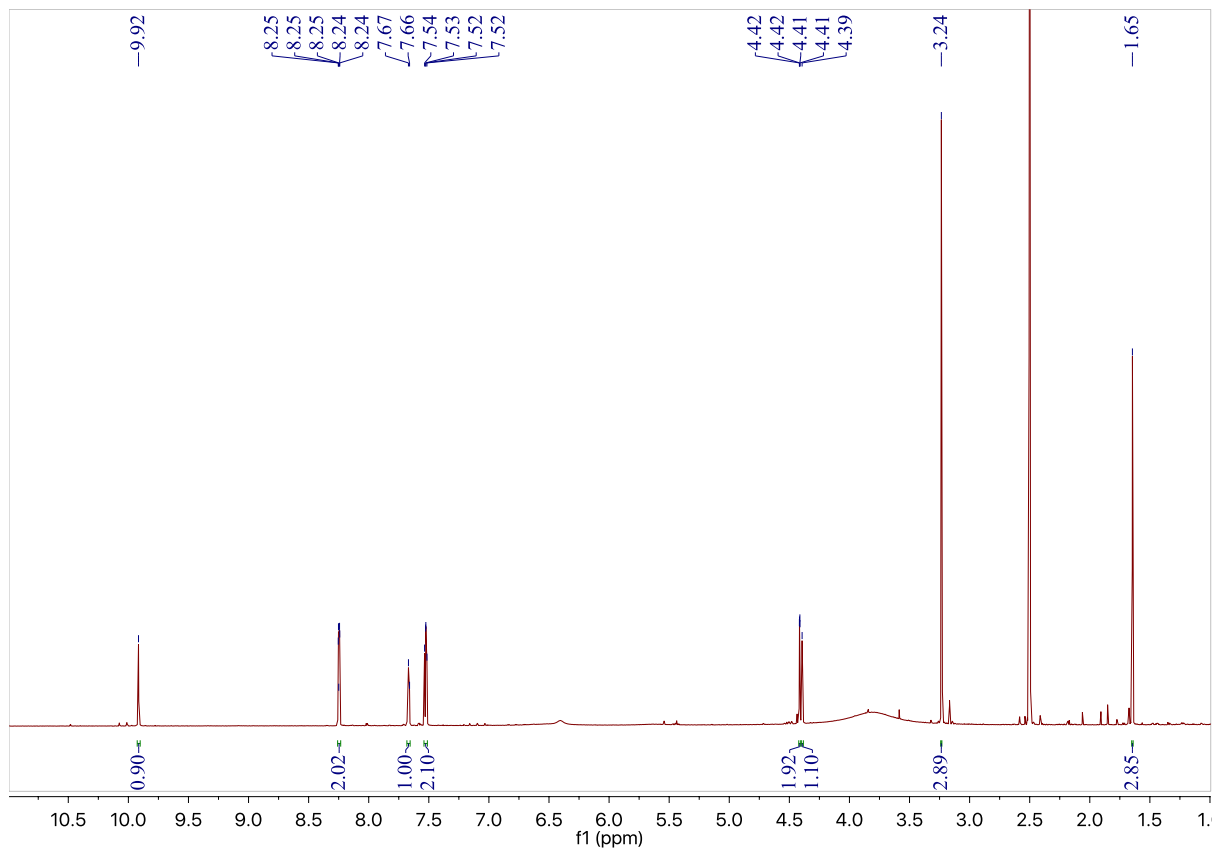

Figure S16  $^1\text{H}$  NMR (800 MHz,  $\text{DMSO}-d_6$ ) spectra of 10

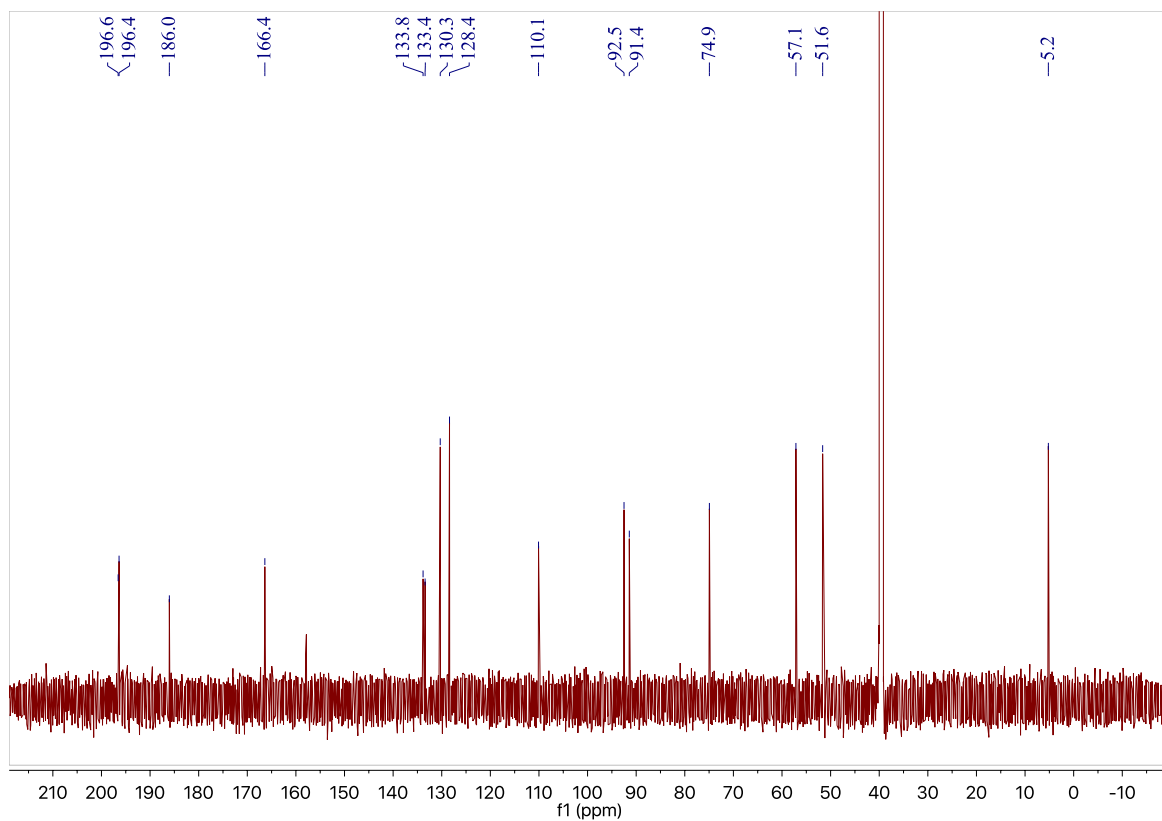

Figure S17  $^{13}\text{C}$  NMR (200 MHz,  $\text{DMSO-}d_6$ ) spectrum of **10**

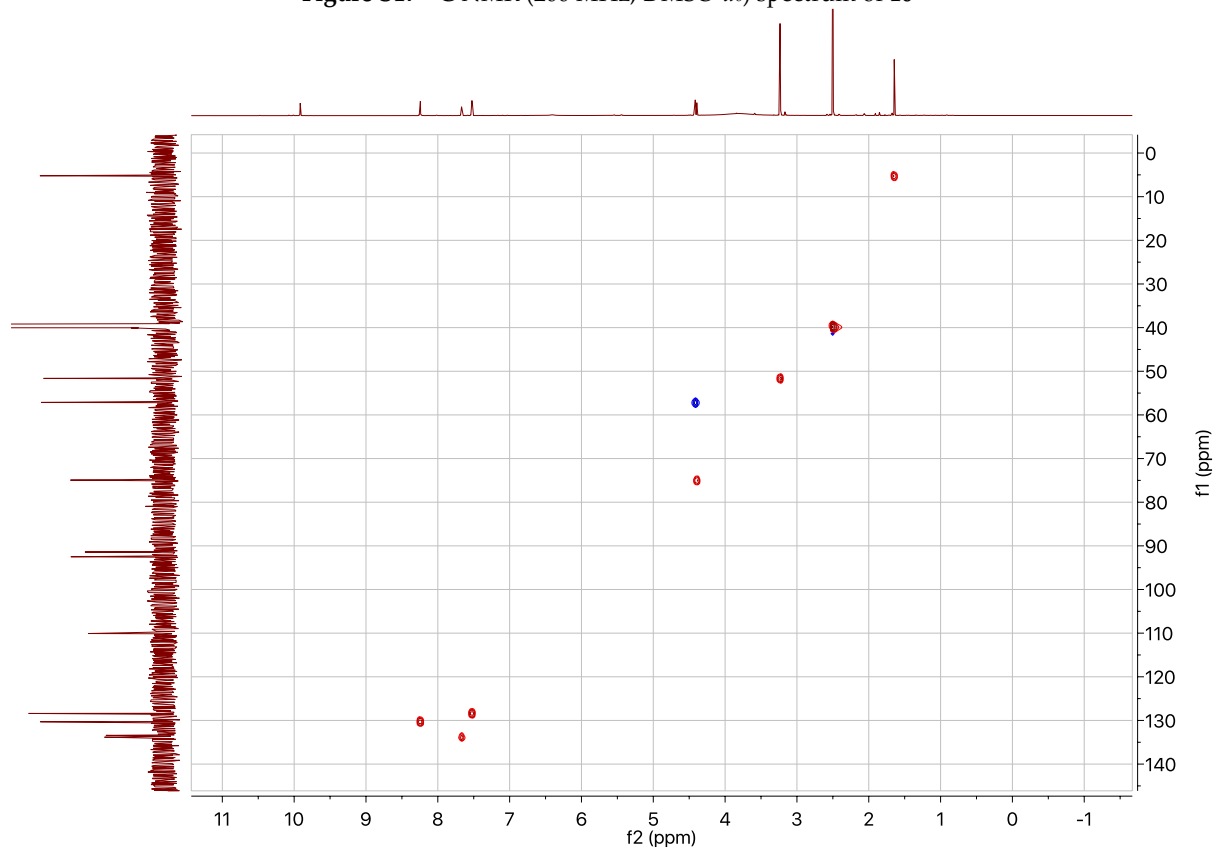

Figure S18 HSQC (800 MHz,  $\text{DMSO-}d_6$ ) spectrum of **10**

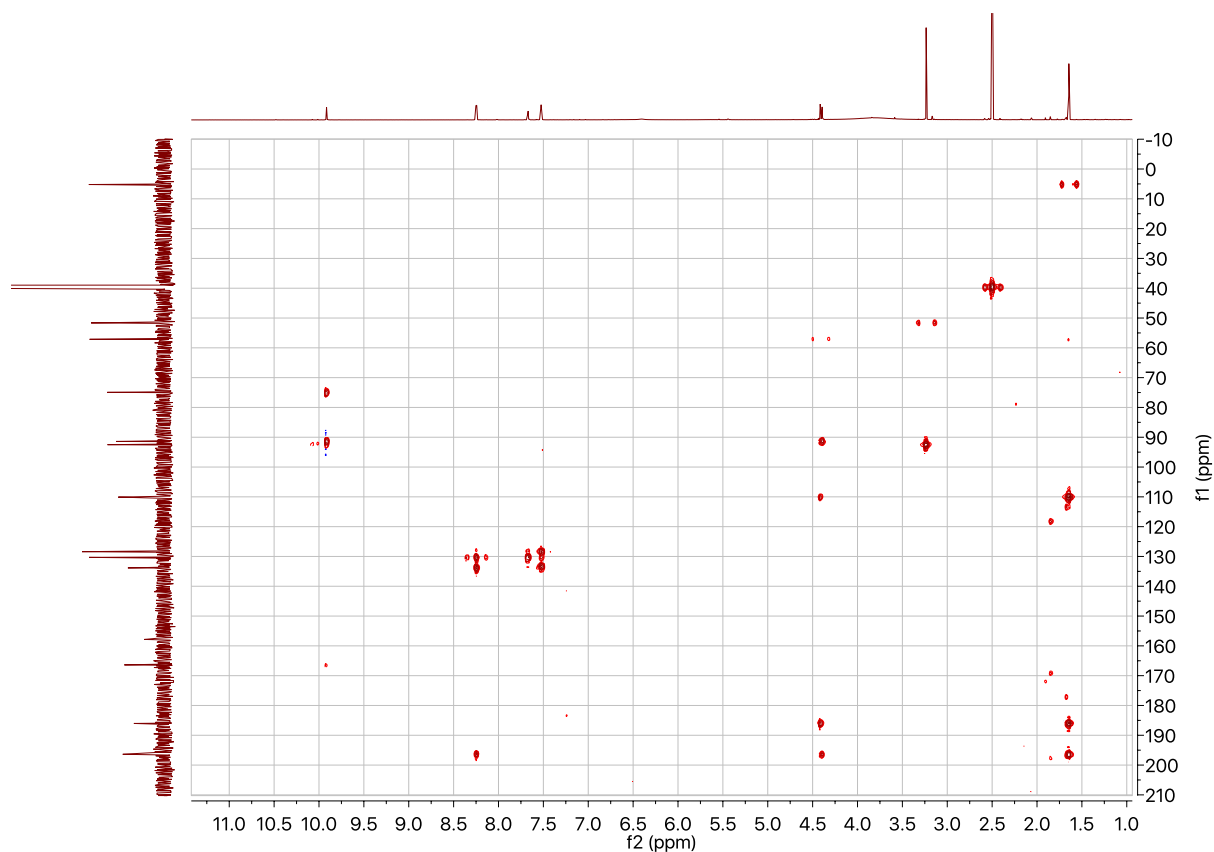

Figure S19 HMBC (800 MHz, DMSO-*d*<sub>6</sub>) spectrum of 10

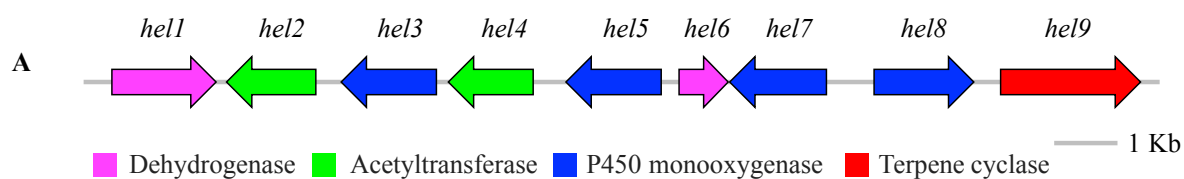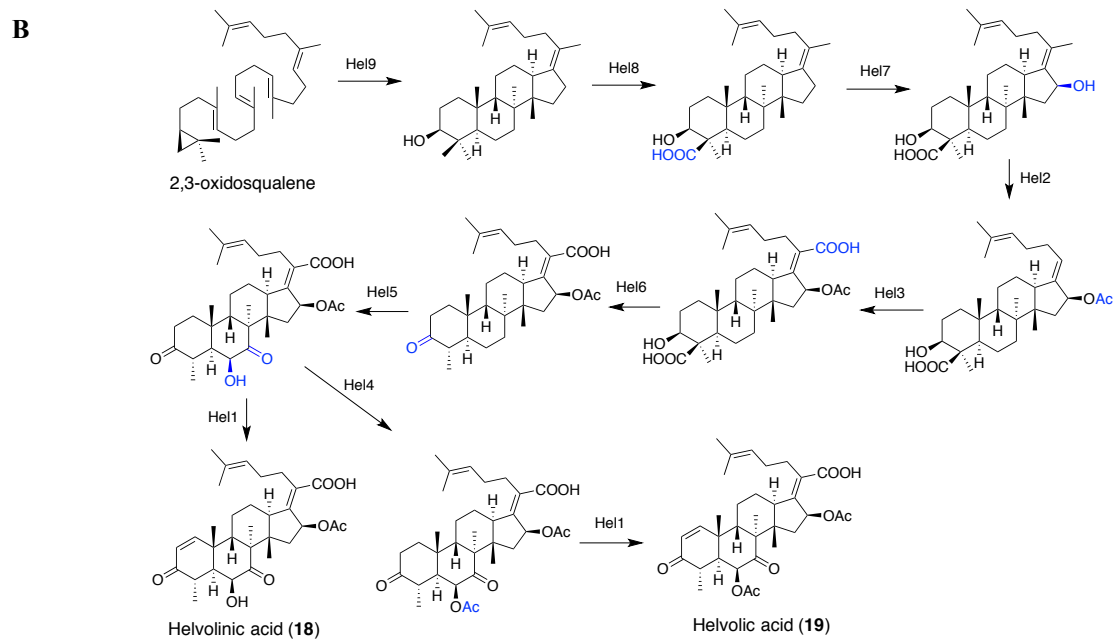

Figure S20 Organization of the fusidane-type antibiotic helvolic acid BGC (*hel*) (A) and proposed biosynthetic pathways for helvolic acid and helvolinic acid.

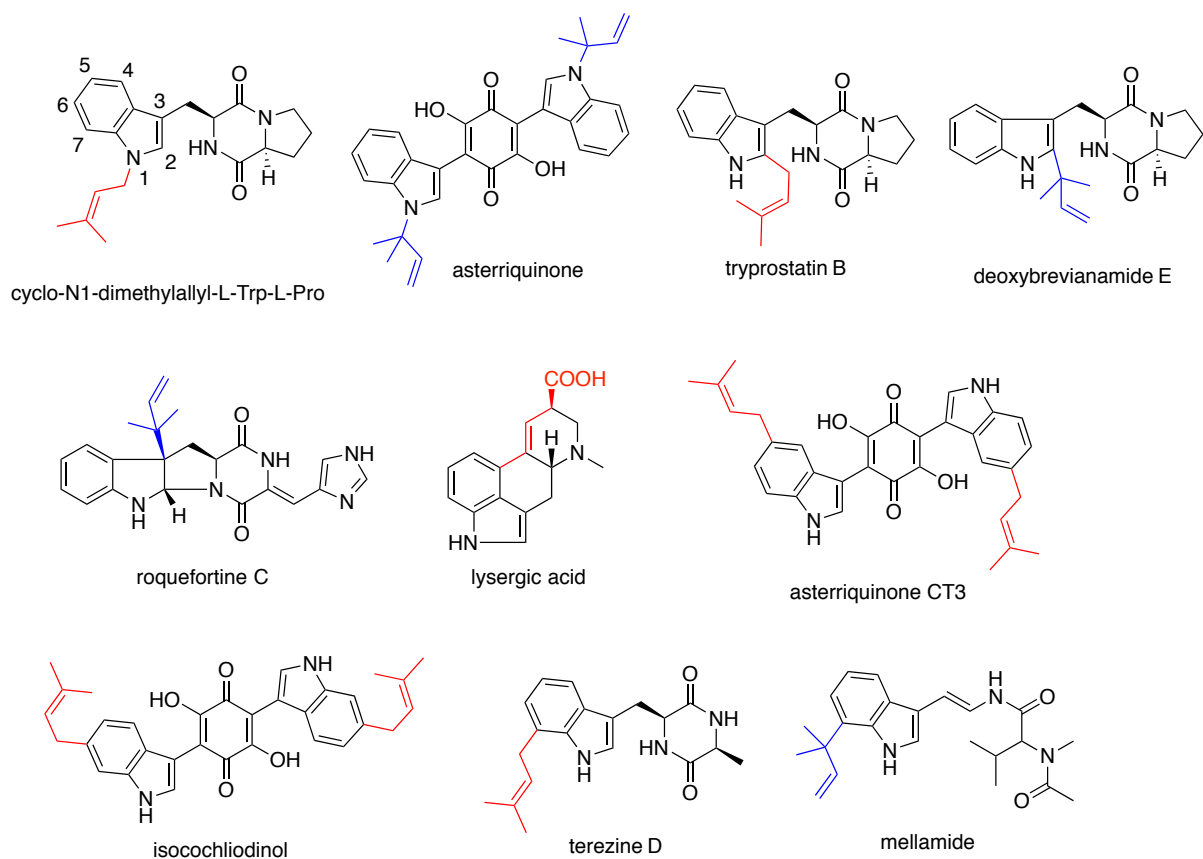

**Figure S21** Representatives of prenylated indole alkaloids.

**Table S1** The calculated  $^{13}\text{C}$  NMR data for two possible isomers (19S) and (19R) of compound 1 and DP4 analysis

| No. | $\delta_{\text{exp}}$ | $\delta_{\text{cal}}$ |       | $\delta_{\text{scal}}$ |       | Error |       | t distribution |       | Probability |       |
|-----|-----------------------|-----------------------|-------|------------------------|-------|-------|-------|----------------|-------|-------------|-------|
|     |                       | (19S)                 | (19R) | (19S)                  | (19R) | (19S) | (19R) | (19S)          | (19R) | (19S)       | (19R) |
| 2   | 131.7                 | 138.1                 | 137.8 | 131.5                  | 134.8 | -0.2  | 3.1   | 0.527          | 0.899 | 0.473       | 0.101 |
| 3   | 119.8                 | 133.5                 | 130.5 | 127.0                  | 127.5 | 7.2   | 7.7   | 0.995          | 0.997 | 0.005       | 0.003 |
| 3a  | 122.4                 | 129.5                 | 128.0 | 123.1                  | 125.0 | 0.7   | 2.6   | 0.611          | 0.856 | 0.389       | 0.144 |
| 4   | 123.0                 | 133.5                 | 126.9 | 127.0                  | 123.9 | 4.0   | 0.9   | 0.945          | 0.644 | 0.055       | 0.356 |
| 5   | 112.5                 | 119.4                 | 119.2 | 113.1                  | 116.2 | 0.6   | 3.7   | 0.602          | 0.930 | 0.398       | 0.070 |
| 6   | 159.8                 | 169.5                 | 168.8 | 162.4                  | 165.9 | 2.6   | 6.1   | 0.854          | 0.988 | 0.146       | 0.012 |
| 7   | 94.1                  | 90.9                  | 93.5  | 85.1                   | 90.4  | -9.0  | -3.7  | 0.999          | 0.932 | 0.001       | 0.068 |
| 7a  | 138.7                 | 144.2                 | 143.2 | 137.5                  | 140.3 | -1.2  | 1.6   | 0.694          | 0.748 | 0.306       | 0.252 |
| 8   | 26.0                  | 29.4                  | 33.0  | 24.6                   | 29.8  | -1.4  | 3.8   | 0.725          | 0.935 | 0.275       | 0.065 |
| 9   | 56.1                  | 65.3                  | 65.8  | 59.9                   | 62.6  | 3.8   | 6.5   | 0.937          | 0.992 | 0.063       | 0.008 |
| 11  | 167.2                 | 171.7                 | 175.1 | 164.6                  | 172.2 | -2.6  | 5.0   | 0.859          | 0.974 | 0.141       | 0.026 |
| 12  | 58.9                  | 64.8                  | 61.4  | 59.5                   | 58.2  | 0.6   | -0.7  | 0.594          | 0.614 | 0.406       | 0.386 |
| 13  | 28.1                  | 33.7                  | 30.4  | 28.8                   | 27.1  | 0.7   | -1.0  | 0.623          | 0.663 | 0.377       | 0.337 |
| 14  | 22.6                  | 25.9                  | 26.4  | 21.1                   | 23.1  | -1.5  | 0.5   | 0.733          | 0.579 | 0.267       | 0.421 |
| 15  | 45.5                  | 49.1                  | 48.9  | 44.0                   | 45.7  | -1.5  | 0.2   | 0.742          | 0.526 | 0.258       | 0.474 |
| 17  | 165.9                 | 170.9                 | 170.1 | 163.7                  | 167.2 | -2.2  | 1.3   | 0.815          | 0.709 | 0.185       | 0.291 |
| 18  | 187.2                 | 193.4                 | 193.1 | 185.9                  | 190.3 | -1.3  | 3.1   | 0.713          | 0.895 | 0.287       | 0.105 |
| 19  | 63.9                  | 68.2                  | 73.6  | 62.7                   | 70.5  | -1.2  | 6.6   | 0.686          | 0.992 | 0.314       | 0.008 |
| 20  | 61.8                  | 69.3                  | 69.2  | 63.8                   | 66.0  | 2.0   | 4.2   | 0.797          | 0.954 | 0.203       | 0.046 |

|                                 |      |             |      |      |      |      |      |       |       |          |          |
|---------------------------------|------|-------------|------|------|------|------|------|-------|-------|----------|----------|
| 21                              | 24.7 | 26.1        | 26.5 | 21.4 | 23.2 | -3.3 | -1.5 | 0.913 | 0.734 | 0.087    | 0.266    |
| 22                              | 18.6 | 18.8        | 20.5 | 14.2 | 17.2 | -4.4 | -1.4 | 0.959 | 0.726 | 0.041    | 0.274    |
| <u>OCH<sub>3</sub></u>          | 55.6 | <b>55.6</b> | 55.6 | 50.3 | 52.4 | -5.3 | -3.2 | 0.979 | 0.907 | 0.021    | 0.093    |
| Product of Probability          |      |             |      |      |      |      |      |       |       | 7.46E-21 | 6.47E-24 |
| Bayes's theorem probability (%) |      |             |      |      |      |      |      |       |       | 99.9     | 0.1      |

**Table S2** Deduced functions of ORFs in fumitremorgins BGC (*ftm*) from MF071

| Protein | Homology | Proposed function               | Origin                       | Accession No. | Identity (%) |
|---------|----------|---------------------------------|------------------------------|---------------|--------------|
| Ftm1    | FtmA     | nonribosomal peptide synthetase | <i>A. fumigatus</i> BM939    | B9WZX0        | 89           |
| Ftm2    | FtmC     | cytochrome P450                 | <i>A. fumigatus</i> BM939    | XP_747185     | 100          |
| Ftm3    | FtmD     | O-methyltransferase             | <i>A. fumigatus</i> NRRL 181 | XP_001261648  | 93           |
| Ftm4    | FtmB     | prenyltransferase               | <i>A. fumigatus</i> BM939    | B9WZX3        | 82           |
| Ftm5    | FtmE     | cytochrome P450                 | <i>A. fumigatus</i> Af293    | XP_747182     | 99           |
| Ftm6    | FtmF     | oxygenase                       | <i>A. fumigatus</i> BM939    | B9WZX5        | 100          |
| Ftm7    | FtmG     | cytochrome P450                 | <i>A. fumigatus</i> BM939    | B9WZX6        | 95           |
| Ftm8    | FtmH     | prenyltransferase               | <i>A. fumigatus</i> BM939    | B9WZX7        | 99           |

**Table S3** Deduced functions of ORFs in pseurotins BGC (*pso*) from MF071

| Protein | Homology | Proposed function                               | Origin                    | Accession No. | Identity (%) |
|---------|----------|-------------------------------------------------|---------------------------|---------------|--------------|
| Pso1    | PsoF     | Dual-functional monooxygenase/methyltransferase | <i>A. fumigatus</i> Af293 | XP_747160     | 96           |
| Pso2    | PsoG     | methionine aminopeptidase                       | <i>A. fumigatus</i> Af293 | XP_747159     | 100          |
| Pso3    | PsoB     | alpha/beta hydrolase                            | <i>A. fumigatus</i> Af293 | XP_747152     | 100          |
| Pso4    | PsoA     | hybrid PKS-NRPS enzyme                          | <i>A. fumigatus</i> Af293 | XP_747151     | 97           |
| Pso5    | PsoC     | methyltransferase                               | <i>A. fumigatus</i> Af293 | XP_747150     | 100          |
| Pso6    | PsoD     | cytochrome P450                                 | <i>A. fumigatus</i> Af293 | XP_747149     | 89           |
| Pso7    | PsoE     | glutathione S-transferase                       | <i>A. fumigatus</i> Af293 | XP_747147     | 100          |

**Table S4** Deduced functions of ORFs in fumigaclavines BGC (*fga*) from MF071

| Protein | Homology  | Proposed function                             | Origin                    | Accession No. | Identity (%) |
|---------|-----------|-----------------------------------------------|---------------------------|---------------|--------------|
| Fga1    | FgaMT     | 4-dimethylallyltryptophan N-methyltransferase | <i>A. fumigatus</i> Af293 | XP_756143     | 100          |
| Fga2    | FgaOx1    | FAD binding oxidoreductase                    | <i>A. fumigatus</i> Af293 | XP_756142     | 100          |
| Fga3    | FgaPT2    | L-tryptophan dimethylallyl transferase        | <i>A. fumigatus</i> Af293 | XP_756141     | 88           |
| Fga4    | FgaCat    | catalase Cat                                  | <i>A. fumigatus</i> Af293 | XP_756140     | 100          |
| Fga5    | FgaAT     | O-acetyltransferase                           | <i>A. fumigatus</i> Af293 | XP_756139     | 99           |
| Fga6    | FgaP450-2 | cytochrome P450                               | <i>A. fumigatus</i> Af293 | XP_756138     | 100          |

|       |           |                                   |                           |           |     |
|-------|-----------|-----------------------------------|---------------------------|-----------|-----|
| Fga7  | FgaDH     | dehydrogenase/oxidoreductase      | <i>A. fumigatus</i> Af293 | XP_756137 | 100 |
| Fga8  | FgaPT1    | dimethylallyl tryptophan synthase | <i>A. fumigatus</i> Af293 | XP_756136 | 100 |
| Fga9  | FgaP450-1 | cytochrome P450                   | <i>A. fumigatus</i> Af293 | XP_756135 | 100 |
| Fga10 | FgaFs     | festuclavine dehydrogenase easG   | <i>A. fumigatus</i> Af293 | XP_756134 | 100 |
| Fga11 | FgaOx3    | chanoclavine-i aldehyde reductase | <i>A. fumigatus</i> Af293 | 4QNW_A    | 100 |

**Table S5** Deduced functions of ORFs in helvolic acid BGC (*hel*) from MF071

| <b>Protein</b> | <b>Homology</b> | <b>Proposed function</b> | <b>Origin</b>             | <b>Accession No.</b> | <b>Identity (%)</b> |
|----------------|-----------------|--------------------------|---------------------------|----------------------|---------------------|
| Hel1           | HelE            | dehydrogenase            | <i>A. fumigatus</i> Af293 | XP_751348            | 94                  |
| Hel2           | HelD2           | acetyltransferase        | <i>A. fumigatus</i> Af293 | XP_751349            | 93                  |
| Hel3           | HelB4           | cytochrome P450          | <i>A. fumigatus</i> Af293 | XP_751350            | 95                  |
| Hel4           | HelD1           | acetyltransferase        | <i>A. fumigatus</i> Af293 | XP_751351            | 89                  |
| Hel5           | HelB3           | cytochrome P450          | <i>A. fumigatus</i> Af293 | XP_751352            | 91                  |
| Hel6           | HelC            | dehydrogenase            | <i>A. fumigatus</i> Af293 | XP_751353            | 87                  |
| Hel7           | HelB2           | cytochrome P450          | <i>A. fumigatus</i> Af293 | XP_751354            | 99                  |
| Hel8           | HelB1           | cytochrome P450          | <i>A. fumigatus</i> Af293 | XP_751355            | 100                 |
| Hel9           | HelA            | squalene-hopene cyclase  | <i>A. fumigatus</i> Af293 | XP_751356            | 100                 |
